# Supplementary material for: Influence of Atmospheric Cold Plasma Exposure on Naturally Present Fungal Spores and Physicochemical Characteristics of Sundried Tomatoes (Solanum lycopersicum L.)
Source: MDPI journal article supplement (doi:10.3390/foods11020210), 2022-01-13
Supplement: s1 [file s1]

## Supplementary Materials

**Table S1.** Identification of the fungi isolates from sun-dried tomatoes, determined by sequences of the ITS,  $\beta$ -tubulin, and Calmodulin gene.

| Sample | Closest relative                    | Accession number | ITS1-ITS4 | $\beta$ t2a- $\beta$ t2b | CMD5-CMD6 |
|--------|-------------------------------------|------------------|-----------|--------------------------|-----------|
| VJT-1  | <i>Aspergillus niger</i>            | MT597823.1       | N.A.      | 99.12                    | N.A.      |
| VJT-6  | <i>Aspergillus niger</i>            | KY990205.1       | N.A.      | 98.8                     | N.A.      |
| VJT-17 | <i>Aspergillus niger</i>            | KU865178.1       | N.A.      | 99.7                     | N.A.      |
| VJT-14 | <i>Aspergillus niger</i>            | MN907662.1       | N.A.      | 99.7                     | N.A.      |
| VJT-15 | <i>Aspergillus niger</i>            | JX545078.1       | N.A.      | 99.7                     | N.A.      |
| VJT-19 | <i>Aspergillus niger</i>            | KJ36066.1        | N.A.      | 99.1                     | N.A.      |
| VJT-26 | <i>Aspergillus niger</i>            | MH447369.1       | N.A.      | 99.1                     | N.A.      |
| VJT-7  | <i>Aspergillus niger</i>            | HQ632731.1       | N.A.      | N.A.                     | 99.6      |
| VJT-12 | <i>Aspergillus niger</i>            | MN493772.1       | N.A.      | 99.1.                    | N.A.      |
| VJT-28 | <i>Aspergillus niger</i>            | LC577101.1       | N.A.      | 99.1.                    | N.A.      |
| VJT-18 | <i>Aspergillus niger</i>            | MTI23512.1       | N.A.      | 99.1.                    | N.A.      |
| VJT-8  | <i>Aspergillus tubingensis</i>      | KY612372.1       | N.A.      | N.A.                     | 98.9      |
| VJT-10 | <i>Aspergillus tubingensis</i>      | KY612372.1       | N.A.      | N.A.                     | 98.9      |
| VJT-16 | <i>Aspergillus tubingensis</i>      | MK166185.1       | N.A.      | N.A.                     | 98.9      |
| VJT-30 | <i>Aspergillus tubingensis</i>      | KX231824.1       | N.A.      | N.A.                     | 98.9      |
| VJT-2  | <i>Aspergillus cristatus</i>        | KY828916.2       | 99.32     | N.A.                     | N.A.      |
| VJT-5  | <i>Aspergillus rugulovalvus</i>     | AB248319.1       | N.A.      | 100                      | N.A.      |
| VJT-20 | <i>Aspergillus amstelodami</i>      | FR775356.2       | N.A.      | 99.7                     | N.A.      |
| VJT-3  | <i>Cladosporium cladosporioides</i> | KY039309.1       | 99.3      | N.A.                     | N.A.      |
| VJT-4  | <i>Corynascus sepedonium</i>        | MK919294.1       | 99.43     | N.A.                     | N.A.      |
| VJT-11 | <i>Rhizopus oryzae</i>              | LC514321.1       | 99.6      | N.A.                     | N.A.      |
| VJT-22 | <i>Rhizopus oryzae</i>              | LC514326.1       | 99.7      | N.A.                     | N.A.      |
| VJT-25 | <i>Rhizopus oryzae</i>              | MT603963.1       | 99.7      | N.A.                     | N.A.      |

N.A.: Not amplified.
